# Supplementary figures and images for: Protein phylogenetics with mass spectrometry. A comparison of methods
Source: Royal Society of Chemistry journal article supplement (doi:10.1039/d1ay00153a), 2021-01-01

## Supplementary Figure 1

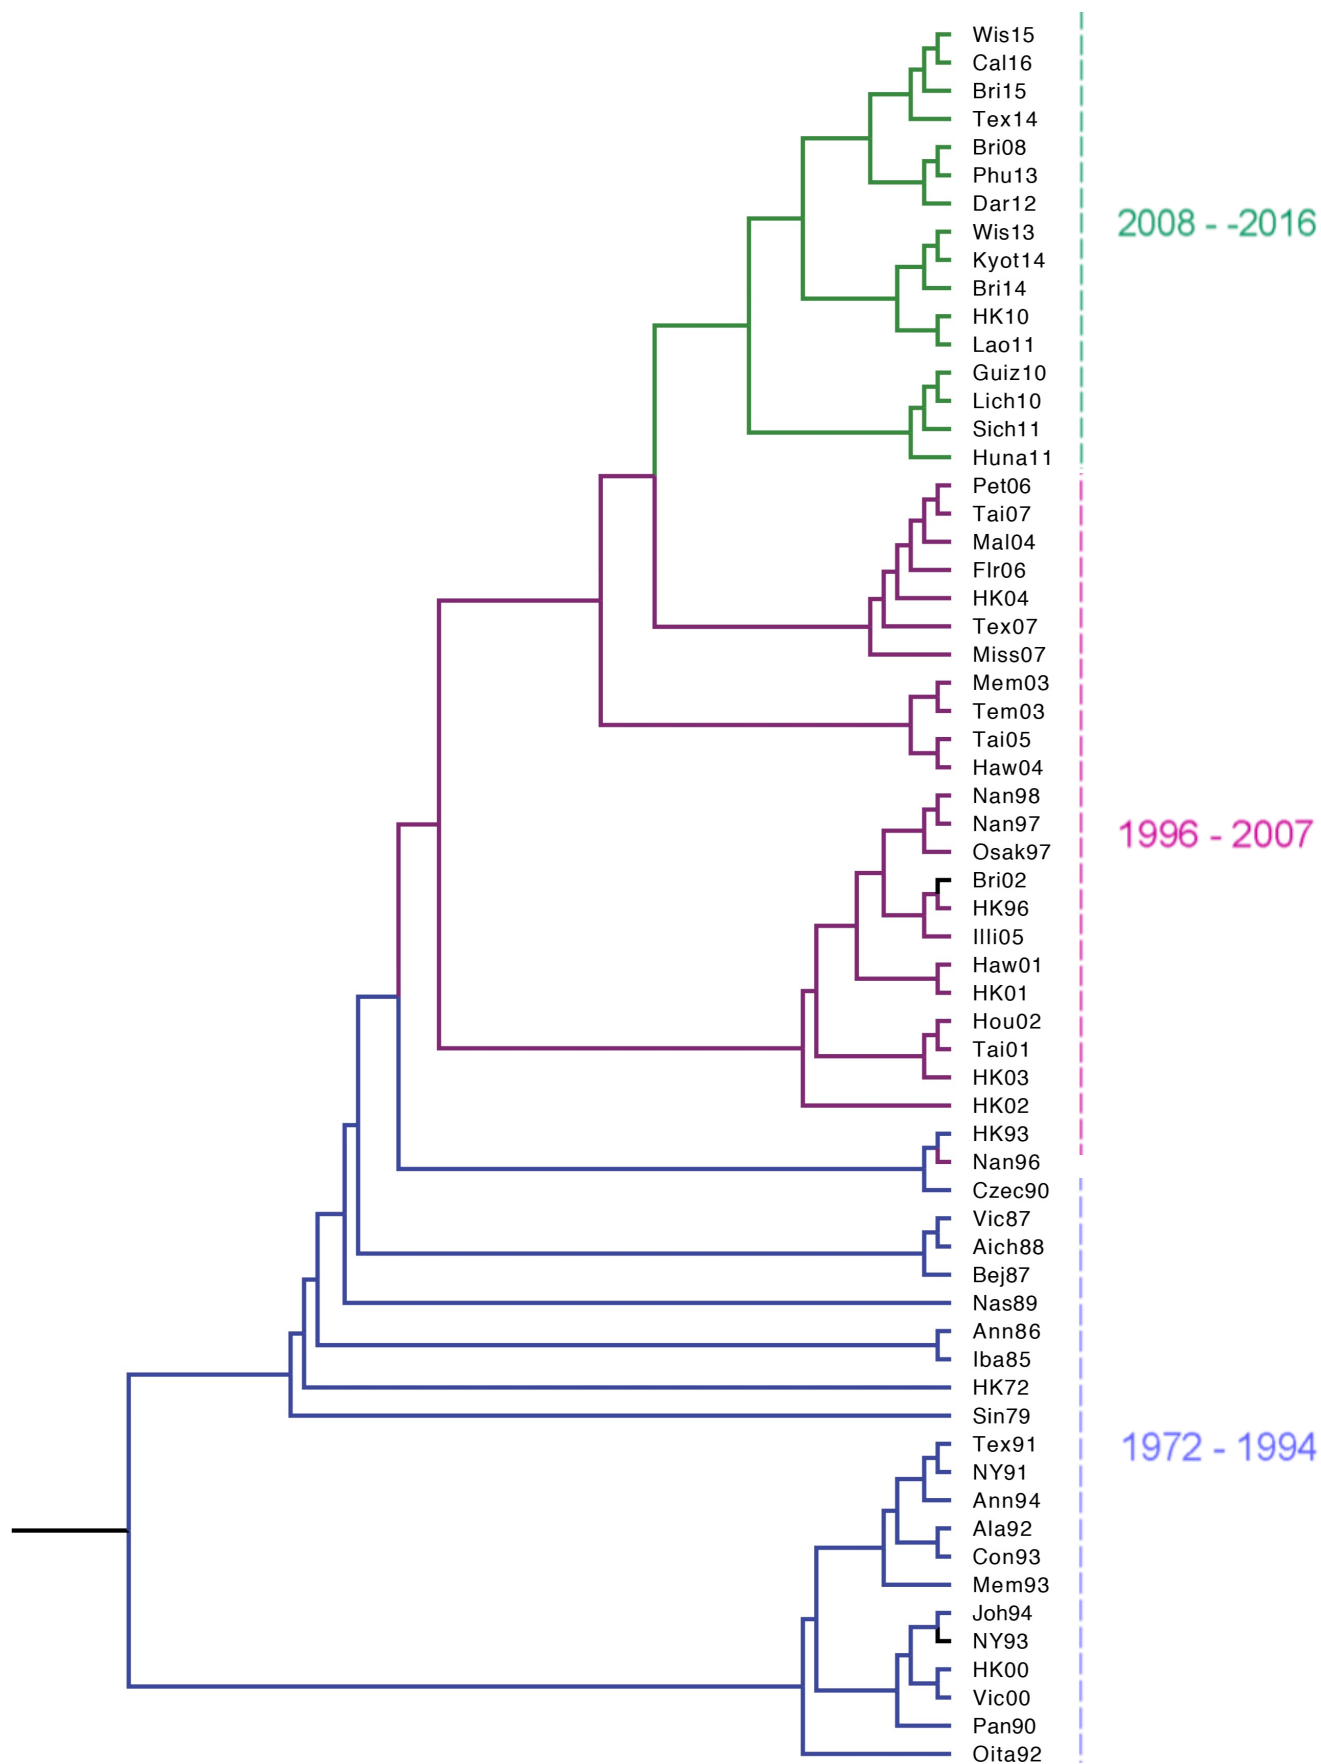

Supplement: d1ay00153a1.pdf [file d1ay00153a1.pdf]
